# Supplementary material for: Development of a TSR-Based Method for Protein 3-D Structural Comparison With Its Applications to Protein Classification and Motif Discovery
Source: Front Chem. 2021 Jan 13;8:602291. doi: 10.3389/fchem.2020.602291 (PMC7838567; doi:10.3389/fchem.2020.602291)
Supplement: Supplementary file 12 [file Table_12.XLSX]

## Sheet: sample_details_kinase_phosphata
Supplementary File 10: Kinase Phsophatase
protein	chain	group
1A9U	first chain or A	MAK
1BL6	first chain or A	MAK
1BL7	first chain or A	MAK
1BMK	first chain or A	MAK
1DI9	first chain or A	MAK
1IAN	first chain or A	MAK
1KV1	first chain or A	MAK
1KV2	first chain or A	MAK
1LEW	first chain or A	MAK
1LEZ	first chain or A	MAK
1M7Q	first chain or A	MAK
1OUK	first chain or A	MAK
1OUY	first chain or A	MAK
1OVE	first chain or A	MAK
1OZ1	first chain or A	MAK
1R39	first chain or A	MAK
1R3C	first chain or A	MAK
1W7H	first chain or A	MAK
1W82	first chain or A	MAK
1W83	first chain or A	MAK
1W84	first chain or A	MAK
1WBN	first chain or A	MAK
1WBO	first chain or A	MAK
1WBS	first chain or A	MAK
1WBT	first chain or A	MAK
1WBV	first chain or A	MAK
1WBW	first chain or A	MAK
1WFC	first chain or A	MAK
1YQJ	first chain or A	MAK
1YW2	first chain or A	MAK
1YWR	first chain or A	MAK
1ZYJ	first chain or A	MAK
1ZZ2	first chain or A	MAK
1ZZL	first chain or A	MAK
2BAJ	first chain or A	MAK
2BAK	first chain or A	MAK
2BAL	first chain or A	MAK
2BAQ	first chain or A	MAK
2EWA	first chain or A	MAK
2GFS	first chain or A	MAK
2GHL	first chain or A	MAK
2GHM	first chain or A	MAK
2GTM	first chain or A	MAK
2GTN	first chain or A	MAK
2I0H	first chain or A	MAK
2LGC	first chain or A	MAK
2NPQ	first chain or A	MAK
2OKR	first chain or A	MAK
2ONL	first chain or A	MAK
2PUU	first chain or A	MAK
2QD9	first chain or A	MAK
2RG5	first chain or A	MAK
2RG6	first chain or A	MAK
2Y8O	first chain or A	MAK
2YIS	first chain or A	MAK
2YIW	first chain or A	MAK
2YIX	first chain or A	MAK
2ZAZ	first chain or A	MAK
2ZB0	first chain or A	MAK
2ZB1	first chain or A	MAK
3BV2	first chain or A	MAK
3BV3	first chain or A	MAK
3BX5	first chain or A	MAK
3C5U	first chain or A	MAK
3CTQ	first chain or A	MAK
3D7Z	first chain or A	MAK
3D83	first chain or A	MAK
3DS6	first chain or A	MAK
3DT1	first chain or A	MAK
3e+92	first chain or A	MAK
3e+93	first chain or A	MAK
3FI4	first chain or A	MAK
3FKL	first chain or A	MAK
3FKN	first chain or A	MAK
3FKO	first chain or A	MAK
3FL4	first chain or A	MAK
3FLQ	first chain or A	MAK
3FLS	first chain or A	MAK
3FLW	first chain or A	MAK
3FLY	first chain or A	MAK
3FLZ	first chain or A	MAK
3FMH	first chain or A	MAK
3FMJ	first chain or A	MAK
3FMK	first chain or A	MAK
3FML	first chain or A	MAK
3FMM	first chain or A	MAK
3FMN	first chain or A	MAK
3FSF	first chain or A	MAK
3FSK	first chain or A	MAK
3GC7	first chain or A	MAK
3GCP	first chain or A	MAK
3GCQ	first chain or A	MAK
3GCS	first chain or A	MAK
3GCU	first chain or A	MAK
3GCV	first chain or A	MAK
3GFE	first chain or A	MAK
3GI3	first chain or A	MAK
3HA8	first chain or A	MAK
3HEC	first chain or A	MAK
3HEG	first chain or A	MAK
3HL7	first chain or A	MAK
3HLL	first chain or A	MAK
3HP2	first chain or A	MAK
3HP5	first chain or A	MAK
3HRB	first chain or A	MAK
3HUB	first chain or A	MAK
3HUC	first chain or A	MAK
3HV3	first chain or A	MAK
3HV4	first chain or A	MAK
3HV5	first chain or A	MAK
3HV6	first chain or A	MAK
3HV7	first chain or A	MAK
3HVC	first chain or A	MAK
3IPH	first chain or A	MAK
3ITZ	first chain or A	MAK
3IW5	first chain or A	MAK
3IW6	first chain or A	MAK
3IW7	first chain or A	MAK
3IW8	first chain or A	MAK
3K3I	first chain or A	MAK
3K3J	first chain or A	MAK
3KF7	first chain or A	MAK
3KQ7	first chain or A	MAK
3L8S	first chain or A	MAK
3L8X	first chain or A	MAK
3LFA	first chain or A	MAK
3LFB	first chain or A	MAK
3LFC	first chain or A	MAK
3LFD	first chain or A	MAK
3LFE	first chain or A	MAK
3LFF	first chain or A	MAK
3LHJ	first chain or A	MAK
3MGY	first chain or A	MAK
3MH0	first chain or A	MAK
3MH1	first chain or A	MAK
3MH2	first chain or A	MAK
3MH3	first chain or A	MAK
3MPA	first chain or A	MAK
3MPT	first chain or A	MAK
3MVL	first chain or A	MAK
3MVM	first chain or A	MAK
3MW1	first chain or A	MAK
3NEW	first chain or A	MAK
3NNU	first chain or A	MAK
3NNV	first chain or A	MAK
3NNW	first chain or A	MAK
3NNX	first chain or A	MAK
3NWW	first chain or A	MAK
3O8P	first chain or A	MAK
3O8T	first chain or A	MAK
3O8U	first chain or A	MAK
3OBG	first chain or A	MAK
3OBJ	first chain or A	MAK
3OC1	first chain or A	MAK
3OCG	first chain or A	MAK
3P4K	first chain or A	MAK
3P5K	first chain or A	MAK
3P78	first chain or A	MAK
3P79	first chain or A	MAK
3P7A	first chain or A	MAK
3P7B	first chain or A	MAK
3P7C	first chain or A	MAK
3PG3	first chain or A	MAK
3PY3	first chain or A	MAK
3QUD	first chain or A	MAK
3QUE	first chain or A	MAK
3RIN	first chain or A	MAK
3ROC	first chain or A	MAK
3S3I	first chain or A	MAK
3S4Q	first chain or A	MAK
3TG1	first chain or A	MAK
3U8W	first chain or A	MAK
3UVP	first chain or A	MAK
3UVQ	first chain or A	MAK
3UVR	first chain or A	MAK
3ZS5	first chain or A	MAK
3ZSG	first chain or A	MAK
3ZSH	first chain or A	MAK
3ZSI	first chain or A	MAK
3ZYA	first chain or A	MAK
4A9Y	first chain or A	MAK
4AA0	first chain or A	MAK
4AA4	first chain or A	MAK
4AA5	first chain or A	MAK
4AAC	first chain or A	MAK
4DLI	first chain or A	MAK
4DLJ	first chain or A	MAK
4E5B	first chain or A	MAK
4E6A	first chain or A	MAK
4E6C	first chain or A	MAK
4E8A	first chain or A	MAK
4EH2	first chain or A	MAK
4EH3	first chain or A	MAK
4EH4	first chain or A	MAK
4EH5	first chain or A	MAK
4EH6	first chain or A	MAK
4EH7	first chain or A	MAK
4EH8	first chain or A	MAK
4EH9	first chain or A	MAK
4EHV	first chain or A	MAK
4EWQ	first chain or A	MAK
4F9W	first chain or A	MAK
4F9Y	first chain or A	MAK
4FA2	first chain or A	MAK
4GEO	first chain or A	MAK
4KA3	first chain or A	MAK
4KIN	first chain or A	MAK
4KIP	first chain or A	MAK
4KIQ	first chain or A	MAK
4L8M	first chain or A	MAK
4LOO	first chain or A	MAK
4LOP	first chain or A	MAK
4LOQ	first chain or A	MAK
4R3C	first chain or A	MAK
4ZTH	first chain or A	MAK
5ETA	first chain or A	MAK
5ETC	first chain or A	MAK
5ETF	first chain or A	MAK
5ETI	first chain or A	MAK
5LAR	first chain or A	MAK
5ML5	first chain or A	MAK
5MTX	first chain or A	MAK
5MTY	first chain or A	MAK
5MZ3	first chain or A	MAK
5N63	first chain or A	MAK
5N64	first chain or A	MAK
5N65	first chain or A	MAK
5N66	first chain or A	MAK
5N67	first chain or A	MAK
5N68	first chain or A	MAK
5O8U	first chain or A	MAK
5O8V	first chain or A	MAK
5O90	first chain or A	MAK
5TBE	first chain or A	MAK
5TCO	first chain or A	MAK
5UOJ	first chain or A	MAK
5WJJ	first chain or A	MAK
5XYX	first chain or A	MAK
5XYY	first chain or A	MAK
6ANL	first chain or A	MAK
1M14	first chain or A	EGFR
1M17	first chain or A	EGFR
1XKK	first chain or A	EGFR
2EB2	first chain or A	EGFR
2EB3	first chain or A	EGFR
2GS2	first chain or A	EGFR
2GS6	first chain or A	EGFR
2GS7	first chain or A	EGFR
2ITN	first chain or A	EGFR
2ITO	first chain or A	EGFR
2ITP	first chain or A	EGFR
2ITQ	first chain or A	EGFR
2ITT	first chain or A	EGFR
2ITU	first chain or A	EGFR
2ITV	first chain or A	EGFR
2ITW	first chain or A	EGFR
2ITX	first chain or A	EGFR
2ITY	first chain or A	EGFR
2ITZ	first chain or A	EGFR
2J5E	first chain or A	EGFR
2J5F	first chain or A	EGFR
2J6M	first chain or A	EGFR
2JIT	first chain or A	EGFR
2JIU	first chain or A	EGFR
2JIV	first chain or A	EGFR
2RF9	first chain or A	EGFR
2RFD	first chain or A	EGFR
2RFE	first chain or A	EGFR
2RGP	first chain or A	EGFR
3BEL	first chain or A	EGFR
3GOP	first chain or A	EGFR
3GT8	first chain or A	EGFR
3IKA	first chain or A	EGFR
3LZB	first chain or A	EGFR
3POZ	first chain or A	EGFR
3UG1	first chain or A	EGFR
3UG2	first chain or A	EGFR
3VJN	first chain or A	EGFR
3VJO	first chain or A	EGFR
3W2O	first chain or A	EGFR
3W2P	first chain or A	EGFR
3W2Q	first chain or A	EGFR
3W2R	first chain or A	EGFR
3W2S	first chain or A	EGFR
3W32	first chain or A	EGFR
3W33	first chain or A	EGFR
4G5J	first chain or A	EGFR
4G5P	first chain or A	EGFR
4HJO	first chain or A	EGFR
4I1Z	first chain or A	EGFR
4I20	first chain or A	EGFR
4I21	first chain or A	EGFR
4I22	first chain or A	EGFR
4I23	first chain or A	EGFR
4I24	first chain or A	EGFR
4JQ7	first chain or A	EGFR
4JQ8	first chain or A	EGFR
4JR3	first chain or A	EGFR
4JRV	first chain or A	EGFR
4LI5	first chain or A	EGFR
4LL0	first chain or A	EGFR
4LQM	first chain or A	EGFR
4LRM	first chain or A	EGFR
4R3P	first chain or A	EGFR
4R3R	first chain or A	EGFR
4R5S	first chain or A	EGFR
4RIW	first chain or A	EGFR
4RIX	first chain or A	EGFR
4RIY	first chain or A	EGFR
4RJ4	first chain or A	EGFR
4RJ5	first chain or A	EGFR
4RJ6	first chain or A	EGFR
4RJ7	first chain or A	EGFR
4RJ8	first chain or A	EGFR
4TKS	first chain or A	EGFR
4WD5	first chain or A	EGFR
4WKQ	first chain or A	EGFR
4WRG	first chain or A	EGFR
4ZAU	first chain or A	EGFR
4ZJV	first chain or A	EGFR
4ZSE	first chain or A	EGFR
5C8K	first chain or A	EGFR
5C8M	first chain or A	EGFR
5C8N	first chain or A	EGFR
5CAL	first chain or A	EGFR
5CAN	first chain or A	EGFR
5CAO	first chain or A	EGFR
5CAP	first chain or A	EGFR
5CAQ	first chain or A	EGFR
5CAS	first chain or A	EGFR
5CAU	first chain or A	EGFR
5CAV	first chain or A	EGFR
5CNN	first chain or A	EGFR
5CNO	first chain or A	EGFR
5CZH	first chain or A	EGFR
5CZI	first chain or A	EGFR
5D41	first chain or A	EGFR
5EDP	first chain or A	EGFR
5EDQ	first chain or A	EGFR
5EDR	first chain or A	EGFR
5EM5	first chain or A	EGFR
5EM6	first chain or A	EGFR
5EM7	first chain or A	EGFR
5EM8	first chain or A	EGFR
5FED	first chain or A	EGFR
5FEE	first chain or A	EGFR
5FEQ	first chain or A	EGFR
5GMP	first chain or A	EGFR
5GNK	first chain or A	EGFR
5GTY	first chain or A	EGFR
5GTZ	first chain or A	EGFR
5HCX	first chain or A	EGFR
5HCY	first chain or A	EGFR
5HCZ	first chain or A	EGFR
5HG5	first chain or A	EGFR
5HG7	first chain or A	EGFR
5HG8	first chain or A	EGFR
5HG9	first chain or A	EGFR
5HIB	first chain or A	EGFR
5HIC	first chain or A	EGFR
5J9Y	first chain or A	EGFR
5J9Z	first chain or A	EGFR
5JEB	first chain or A	EGFR
5U8L	first chain or A	EGFR
5UG8	first chain or A	EGFR
5UG9	first chain or A	EGFR
5UGA	first chain or A	EGFR
5UGB	first chain or A	EGFR
5UGC	first chain or A	EGFR
5UWD	first chain or A	EGFR
5X26	first chain or A	EGFR
5X27	first chain or A	EGFR
5X28	first chain or A	EGFR
5X2A	first chain or A	EGFR
5X2C	first chain or A	EGFR
5X2F	first chain or A	EGFR
5X2K	first chain or A	EGFR
5XDK	first chain or A	EGFR
5XDL	first chain or A	EGFR
5XGM	first chain or A	EGFR
5XGN	first chain or A	EGFR
5Y25	first chain or A	EGFR
5Y9T	first chain or A	EGFR
5YU9	first chain or A	EGFR
5ZWJ	first chain or A	EGFR
6D8E	first chain or A	EGFR
1DAW	first chain or A	CKII
1DAY	first chain or A	CKII
1DS5	first chain or A	CKII
1F0Q	first chain or A	CKII
1J91	first chain or A	CKII
1JAM	first chain or A	CKII
1JWH	first chain or A	CKII
1LP4	first chain or A	CKII
1LPU	first chain or A	CKII
1LR4	first chain or A	CKII
1M2P	first chain or A	CKII
1M2Q	first chain or A	CKII
1M2R	first chain or A	CKII
1NA7	first chain or A	CKII
1OM1	first chain or A	CKII
1PJK	first chain or A	CKII
1ZOE	first chain or A	CKII
1ZOG	first chain or A	CKII
1ZOH	first chain or A	CKII
2OXD	first chain or A	CKII
2OXX	first chain or A	CKII
2OXY	first chain or A	CKII
2PVH	first chain or A	CKII
2PVJ	first chain or A	CKII
2PVK	first chain or A	CKII
2PVL	first chain or A	CKII
2PVM	first chain or A	CKII
2PVN	first chain or A	CKII
2PVR	first chain or A	CKII
2QC6	first chain or A	CKII
2R7I	first chain or A	CKII
2ZJW	first chain or A	CKII
3AMY	first chain or A	CKII
3AT2	first chain or A	CKII
3AT3	first chain or A	CKII
3AT4	first chain or A	CKII
3AXW	first chain or A	CKII
3BE9	first chain or A	CKII
3BQC	first chain or A	CKII
3C13	first chain or A	CKII
3FL5	first chain or A	CKII
3FWQ	first chain or A	CKII
3H30	first chain or A	CKII
3JUH	first chain or A	CKII
3KXG	first chain or A	CKII
3KXH	first chain or A	CKII
3KXM	first chain or A	CKII
3KXN	first chain or A	CKII
3MB6	first chain or A	CKII
3MB7	first chain or A	CKII
3NGA	first chain or A	CKII
3NSZ	first chain or A	CKII
3OWJ	first chain or A	CKII
3OWK	first chain or A	CKII
3OWL	first chain or A	CKII
3PE1	first chain or A	CKII
3PE2	first chain or A	CKII
3PVG	first chain or A	CKII
3PWD	first chain or A	CKII
3PZH	first chain or A	CKII
3Q04	first chain or A	CKII
3Q9W	first chain or A	CKII
3Q9X	first chain or A	CKII
3Q9Y	first chain or A	CKII
3Q9Z	first chain or A	CKII
3QA0	first chain or A	CKII
3R0T	first chain or A	CKII
3RPS	first chain or A	CKII
3U4U	first chain or A	CKII
3U87	first chain or A	CKII
3U9C	first chain or A	CKII
3W8L	first chain or A	CKII
3WAR	first chain or A	CKII
3WIK	first chain or A	CKII
3WIL	first chain or A	CKII
3WOW	first chain or A	CKII
4ANM	first chain or A	CKII
4DGM	first chain or A	CKII
4DGN	first chain or A	CKII
4DGO	first chain or A	CKII
4FBX	first chain or A	CKII
4FI1	first chain or A	CKII
4GRB	first chain or A	CKII
4GUB	first chain or A	CKII
4IB5	first chain or A	CKII
4JQE	first chain or A	CKII
4JR7	first chain or A	CKII
4KWP	first chain or A	CKII
4LFI	first chain or A	CKII
4MWH	first chain or A	CKII
4NH1	first chain or A	CKII
4RLK	first chain or A	CKII
4RLL	first chain or A	CKII
4UB7	first chain or A	CKII
4UBA	first chain or A	CKII
5B0X	first chain or A	CKII
5CLP	first chain or A	CKII
5CQU	first chain or A	CKII
5CQW	first chain or A	CKII
5CS6	first chain or A	CKII
5CSH	first chain or A	CKII
5CSP	first chain or A	CKII
5CSV	first chain or A	CKII
5CT0	first chain or A	CKII
5CTP	first chain or A	CKII
5CU0	first chain or A	CKII
5CU2	first chain or A	CKII
5CU3	first chain or A	CKII
5CU4	first chain or A	CKII
5CU6	first chain or A	CKII
5CVF	first chain or A	CKII
5CVG	first chain or A	CKII
5CVH	first chain or A	CKII
5CX9	first chain or A	CKII
5H8B	first chain or A	CKII
5H8E	first chain or A	CKII
5H8G	first chain or A	CKII
5KU8	first chain or A	CKII
5KWH	first chain or A	CKII
5M44	first chain or A	CKII
5M4C	first chain or A	CKII
5M4F	first chain or A	CKII
5M4I	first chain or A	CKII
5MMF	first chain or A	CKII
5MMR	first chain or A	CKII
5MO5	first chain or A	CKII
5MO6	first chain or A	CKII
5MO7	first chain or A	CKII
5MO8	first chain or A	CKII
5MOD	first chain or A	CKII
5MOE	first chain or A	CKII
5MOH	first chain or A	CKII
5MOT	first chain or A	CKII
5MOV	first chain or A	CKII
5MOW	first chain or A	CKII
5MP8	first chain or A	CKII
5MPJ	first chain or A	CKII
5N1V	first chain or A	CKII
5N9K	first chain or A	CKII
5N9L	first chain or A	CKII
5N9N	first chain or A	CKII
5NQC	first chain or A	CKII
5OMY	first chain or A	CKII
5ONI	first chain or A	CKII
5OQU	first chain or A	CKII
5ORH	first chain or A	CKII
5ORJ	first chain or A	CKII
5ORK	first chain or A	CKII
5OS7	first chain or A	CKII
5OS8	first chain or A	CKII
5OSL	first chain or A	CKII
5OSP	first chain or A	CKII
5OSR	first chain or A	CKII
5OSU	first chain or A	CKII
5OSZ	first chain or A	CKII
5OT5	first chain or A	CKII
5OT6	first chain or A	CKII
5OTD	first chain or A	CKII
5OTH	first chain or A	CKII
5OTI	first chain or A	CKII
5OTL	first chain or A	CKII
5OTO	first chain or A	CKII
5OTP	first chain or A	CKII
5OTQ	first chain or A	CKII
5OTR	first chain or A	CKII
5OTS	first chain or A	CKII
5OTY	first chain or A	CKII
5OTZ	first chain or A	CKII
5OUE	first chain or A	CKII
5OUL	first chain or A	CKII
5OUM	first chain or A	CKII
5OUU	first chain or A	CKII
5OWH	first chain or A	CKII
5OWL	first chain or A	CKII
5OYF	first chain or A	CKII
5T1H	first chain or A	CKII
5TS8	first chain or A	CKII
6EHK	first chain or A	CKII
6EHU	first chain or A	CKII
6EII	first chain or A	CKII
6GIH	first chain or A	CKII
6GMD	first chain or A	CKII
1BKX	first chain or A	CAMPDK
1BX6	first chain or A	CAMPDK
1CDK	first chain or A	CAMPDK
1J3H	first chain or A	CAMPDK
1Q24	first chain or A	CAMPDK
1Q61	first chain or A	CAMPDK
1Q62	first chain or A	CAMPDK
1Q8T	first chain or A	CAMPDK
1Q8U	first chain or A	CAMPDK
1Q8W	first chain or A	CAMPDK
1RE8	first chain or A	CAMPDK
1REJ	first chain or A	CAMPDK
1REK	first chain or A	CAMPDK
1SMH	first chain or A	CAMPDK
1SVE	first chain or A	CAMPDK
1SVG	first chain or A	CAMPDK
1SVH	first chain or A	CAMPDK
1SYK	first chain or A	CAMPDK
1SZM	first chain or A	CAMPDK
1VEB	first chain or A	CAMPDK
1XH4	first chain or A	CAMPDK
1XH5	first chain or A	CAMPDK
1XH6	first chain or A	CAMPDK
1XH7	first chain or A	CAMPDK
1XH8	first chain or A	CAMPDK
1XH9	first chain or A	CAMPDK
1XHA	first chain or A	CAMPDK
2C1A	first chain or A	CAMPDK
2C1B	first chain or A	CAMPDK
2GFC	first chain or A	CAMPDK
2GNF	first chain or A	CAMPDK
2GNG	first chain or A	CAMPDK
2GNH	first chain or A	CAMPDK
2GNI	first chain or A	CAMPDK
2GNJ	first chain or A	CAMPDK
2GNL	first chain or A	CAMPDK
2GU8	first chain or A	CAMPDK
2JDS	first chain or A	CAMPDK
2JDT	first chain or A	CAMPDK
2JDV	first chain or A	CAMPDK
2QCS	first chain or A	CAMPDK
2QUR	first chain or A	CAMPDK
2UVX	first chain or A	CAMPDK
2UVY	first chain or A	CAMPDK
2UVZ	first chain or A	CAMPDK
2UW0	first chain or A	CAMPDK
2UW3	first chain or A	CAMPDK
2UW4	first chain or A	CAMPDK
2UW5	first chain or A	CAMPDK
2UW6	first chain or A	CAMPDK
2UW7	first chain or A	CAMPDK
2UW8	first chain or A	CAMPDK
2UZT	first chain or A	CAMPDK
2UZV	first chain or A	CAMPDK
2VNW	first chain or A	CAMPDK
2VNY	first chain or A	CAMPDK
2VO0	first chain or A	CAMPDK
2VO3	first chain or A	CAMPDK
2VO6	first chain or A	CAMPDK
2VO7	first chain or A	CAMPDK
3AG9	first chain or A	CAMPDK
3AGL	first chain or A	CAMPDK
3AGM	first chain or A	CAMPDK
3AMA	first chain or A	CAMPDK
3AMB	first chain or A	CAMPDK
3BWJ	first chain or A	CAMPDK
3DND	first chain or A	CAMPDK
3DNE	first chain or A	CAMPDK
3E8C	first chain or A	CAMPDK
3E8E	first chain or A	CAMPDK
3FHI	first chain or A	CAMPDK
3IDB	first chain or A	CAMPDK
3IDC	first chain or A	CAMPDK
3KKV	first chain or A	CAMPDK
3L9L	first chain or A	CAMPDK
3L9M	first chain or A	CAMPDK
3L9N	first chain or A	CAMPDK
3MVJ	first chain or A	CAMPDK
3NX8	first chain or A	CAMPDK
3OOG	first chain or A	CAMPDK
3OVV	first chain or A	CAMPDK
3OW3	first chain or A	CAMPDK
3OWP	first chain or A	CAMPDK
3OXT	first chain or A	CAMPDK
3P0M	first chain or A	CAMPDK
3POO	first chain or A	CAMPDK
3PVB	first chain or A	CAMPDK
3VQH	first chain or A	CAMPDK
3X2U	first chain or A	CAMPDK
3X2V	first chain or A	CAMPDK
3X2W	first chain or A	CAMPDK
3ZO1	first chain or A	CAMPDK
3ZO2	first chain or A	CAMPDK
3ZO3	first chain or A	CAMPDK
3ZO4	first chain or A	CAMPDK
4AE6	first chain or A	CAMPDK
4AE9	first chain or A	CAMPDK
4AXA	first chain or A	CAMPDK
4C33	first chain or A	CAMPDK
4C34	first chain or A	CAMPDK
4C35	first chain or A	CAMPDK
4C36	first chain or A	CAMPDK
4C37	first chain or A	CAMPDK
4C38	first chain or A	CAMPDK
4DFY	first chain or A	CAMPDK
4DH1	first chain or A	CAMPDK
4DH3	first chain or A	CAMPDK
4DH5	first chain or A	CAMPDK
4DH7	first chain or A	CAMPDK
4DH8	first chain or A	CAMPDK
4DIN	first chain or A	CAMPDK
4IAC	first chain or A	CAMPDK
4IAD	first chain or A	CAMPDK
4IAF	first chain or A	CAMPDK
4IAI	first chain or A	CAMPDK
4IAK	first chain or A	CAMPDK
4IAY	first chain or A	CAMPDK
4IAZ	first chain or A	CAMPDK
4IB0	first chain or A	CAMPDK
4IB1	first chain or A	CAMPDK
4IB3	first chain or A	CAMPDK
4IE9	first chain or A	CAMPDK
4IJ9	first chain or A	CAMPDK
4NTS	first chain or A	CAMPDK
4NTT	first chain or A	CAMPDK
4O21	first chain or A	CAMPDK
4O22	first chain or A	CAMPDK
4UJ1	first chain or A	CAMPDK
4UJ2	first chain or A	CAMPDK
4UJ9	first chain or A	CAMPDK
4UJA	first chain or A	CAMPDK
4UJB	first chain or A	CAMPDK
4WB5	first chain or A	CAMPDK
4WB6	first chain or A	CAMPDK
4WB7	first chain or A	CAMPDK
4WBB	first chain or A	CAMPDK
4WIH	first chain or A	CAMPDK
4X6R	first chain or A	CAMPDK
4XW4	first chain or A	CAMPDK
4XW5	first chain or A	CAMPDK
4XW6	first chain or A	CAMPDK
4YXR	first chain or A	CAMPDK
4YXS	first chain or A	CAMPDK
4Z84	first chain or A	CAMPDK
5BX6	first chain or A	CAMPDK
5BX7	first chain or A	CAMPDK
5IZF	first chain or A	CAMPDK
5IZJ	first chain or A	CAMPDK
5J5X	first chain or A	CAMPDK
5JR7	first chain or A	CAMPDK
5LCP	first chain or A	CAMPDK
5LCQ	first chain or A	CAMPDK
5LCR	first chain or A	CAMPDK
5LCT	first chain or A	CAMPDK
5LCU	first chain or A	CAMPDK
5M0B	first chain or A	CAMPDK
5M0C	first chain or A	CAMPDK
5M0L	first chain or A	CAMPDK
5M0U	first chain or A	CAMPDK
5M6V	first chain or A	CAMPDK
5M6Y	first chain or A	CAMPDK
5M71	first chain or A	CAMPDK
5M75	first chain or A	CAMPDK
5MHI	first chain or A	CAMPDK
5N1D	first chain or A	CAMPDK
5N1E	first chain or A	CAMPDK
5N1F	first chain or A	CAMPDK
5N1G	first chain or A	CAMPDK
5N1H	first chain or A	CAMPDK
5N1K	first chain or A	CAMPDK
5N1L	first chain or A	CAMPDK
5N1M	first chain or A	CAMPDK
5N1N	first chain or A	CAMPDK
5N1O	first chain or A	CAMPDK
5N23	first chain or A	CAMPDK
5N32	first chain or A	CAMPDK
5N33	first chain or A	CAMPDK
5N36	first chain or A	CAMPDK
5N37	first chain or A	CAMPDK
5N39	first chain or A	CAMPDK
5N3A	first chain or A	CAMPDK
5N3B	first chain or A	CAMPDK
5N3C	first chain or A	CAMPDK
5N3D	first chain or A	CAMPDK
5N3E	first chain or A	CAMPDK
5N3F	first chain or A	CAMPDK
5N3G	first chain or A	CAMPDK
5N3H	first chain or A	CAMPDK
5N3I	first chain or A	CAMPDK
5N3J	first chain or A	CAMPDK
5N3K	first chain or A	CAMPDK
5N3L	first chain or A	CAMPDK
5N3M	first chain or A	CAMPDK
5N3N	first chain or A	CAMPDK
5N3O	first chain or A	CAMPDK
5N3P	first chain or A	CAMPDK
5N3Q	first chain or A	CAMPDK
5N3R	first chain or A	CAMPDK
5N3S	first chain or A	CAMPDK
5N3T	first chain or A	CAMPDK
5N7P	first chain or A	CAMPDK
5N7U	first chain or A	CAMPDK
5NTJ	first chain or A	CAMPDK
5NW8	first chain or A	CAMPDK
5O0E	first chain or A	CAMPDK
5O5M	first chain or A	CAMPDK
5OK3	first chain or A	CAMPDK
5OL3	first chain or A	CAMPDK
5OT3	first chain or A	CAMPDK
5OTG	first chain or A	CAMPDK
5OUA	first chain or A	CAMPDK
5OUC	first chain or A	CAMPDK
5OUS	first chain or A	CAMPDK
5UZK	first chain or A	CAMPDK
5VHB	first chain or A	CAMPDK
5VI9	first chain or A	CAMPDK
5VIB	first chain or A	CAMPDK
6C0U	first chain or A	CAMPDK
1FMK	first chain or A	SRC
1KSW	first chain or A	SRC
1Y57	first chain or A	SRC
1YI6	first chain or A	SRC
1YOJ	first chain or A	SRC
1YOL	first chain or A	SRC
1YOM	first chain or A	SRC
2BDF	first chain or A	SRC
2BDJ	first chain or A	SRC
2H8H	first chain or A	SRC
2HWO	first chain or A	SRC
2HWP	first chain or A	SRC
2OIQ	first chain or A	SRC
2PTK	first chain or A	SRC
2QI8	first chain or A	SRC
2QLQ	first chain or A	SRC
2QQ7	first chain or A	SRC
2SRC	first chain or A	SRC
3D7T	first chain or A	SRC
3D7U	first chain or A	SRC
3DQW	first chain or A	SRC
3DQX	first chain or A	SRC
3EL7	first chain or A	SRC
3EL8	first chain or A	SRC
3EN4	first chain or A	SRC
3EN5	first chain or A	SRC
3EN6	first chain or A	SRC
3EN7	first chain or A	SRC
3F3T	first chain or A	SRC
3F3U	first chain or A	SRC
3F3V	first chain or A	SRC
3F3W	first chain or A	SRC
3F6X	first chain or A	SRC
3G5D	first chain or A	SRC
3G6G	first chain or A	SRC
3G6H	first chain or A	SRC
3GEQ	first chain or A	SRC
3LOK	first chain or A	SRC
3OEZ	first chain or A	SRC
3OF0	first chain or A	SRC
3QLF	first chain or A	SRC
3QLG	first chain or A	SRC
3SVV	first chain or A	SRC
3TZ7	first chain or A	SRC
3TZ8	first chain or A	SRC
3TZ9	first chain or A	SRC
3U4W	first chain or A	SRC
3U51	first chain or A	SRC
3UQF	first chain or A	SRC
3UQG	first chain or A	SRC
4AGW	first chain or A	SRC
4DGG	first chain or A	SRC
4FIC	first chain or A	SRC
4K11	first chain or A	SRC
4LGG	first chain or A	SRC
4LGH	first chain or A	SRC
4MCV	first chain or A	SRC
4MXO	first chain or A	SRC
4MXX	first chain or A	SRC
4MXY	first chain or A	SRC
4MXZ	first chain or A	SRC
4O2P	first chain or A	SRC
4U5J	first chain or A	SRC
4YBJ	first chain or A	SRC
4YBK	first chain or A	SRC
5BMM	first chain or A	SRC
5D10	first chain or A	SRC
5D11	first chain or A	SRC
5D12	first chain or A	SRC
5J5S	first chain or A	SRC
5K9I	first chain or A	SRC
5SWH	first chain or A	SRC
5SYS	first chain or A	SRC
5T0P	first chain or A	SRC
5TEH	first chain or A	SRC
5XP5	first chain or A	SRC
5XP7	first chain or A	SRC
1AQ1	first chain or A	CDK
1B38	first chain or A	CDK
1B39	first chain or A	CDK
1BLX	first chain or A	CDK
1CKP	first chain or A	CDK
1DI8	first chain or A	CDK
1DM2	first chain or A	CDK
1E1V	first chain or A	CDK
1E1X	first chain or A	CDK
1E9H	first chain or A	CDK
1F5Q	first chain or A	CDK
1FIN	first chain or A	CDK
1FVT	first chain or A	CDK
1FVV	first chain or A	CDK
1G5S	first chain or A	CDK
1GIH	first chain or A	CDK
1GII	first chain or A	CDK
1GIJ	first chain or A	CDK
1GY3	first chain or A	CDK
1GZ8	first chain or A	CDK
1H00	first chain or A	CDK
1H01	first chain or A	CDK
1H07	first chain or A	CDK
1H08	first chain or A	CDK
1H0V	first chain or A	CDK
1H0W	first chain or A	CDK
1H1P	first chain or A	CDK
1H1Q	first chain or A	CDK
1H1R	first chain or A	CDK
1H1S	first chain or A	CDK
1H24	first chain or A	CDK
1H25	first chain or A	CDK
1H26	first chain or A	CDK
1H27	first chain or A	CDK
1H28	first chain or A	CDK
1HCK	first chain or A	CDK
1HCL	first chain or A	CDK
1JST	first chain or A	CDK
1JSU	first chain or A	CDK
1JSV	first chain or A	CDK
1KE5	first chain or A	CDK
1KE6	first chain or A	CDK
1KE7	first chain or A	CDK
1KE8	first chain or A	CDK
1KE9	first chain or A	CDK
1OGU	first chain or A	CDK
1OI9	first chain or A	CDK
1OIQ	first chain or A	CDK
1OIR	first chain or A	CDK
1OIT	first chain or A	CDK
1OIU	first chain or A	CDK
1OIY	first chain or A	CDK
1OKV	first chain or A	CDK
1OKW	first chain or A	CDK
1OL1	first chain or A	CDK
1OL2	first chain or A	CDK
1P2A	first chain or A	CDK
1PF8	first chain or A	CDK
1PKD	first chain or A	CDK
1PW2	first chain or A	CDK
1PXI	first chain or A	CDK
1PXJ	first chain or A	CDK
1PXK	first chain or A	CDK
1PXL	first chain or A	CDK
1PXM	first chain or A	CDK
1PXN	first chain or A	CDK
1PXO	first chain or A	CDK
1PXP	first chain or A	CDK
1PYE	first chain or A	CDK
1QMZ	first chain or A	CDK
1R78	first chain or A	CDK
1URC	first chain or A	CDK
1URW	first chain or A	CDK
1V1K	first chain or A	CDK
1W8C	first chain or A	CDK
1W98	first chain or A	CDK
1WCC	first chain or A	CDK
1XO2	first chain or A	CDK
1Y8Y	first chain or A	CDK
1Y91	first chain or A	CDK
1YKR	first chain or A	CDK
2A4L	first chain or A	CDK
2B52	first chain or A	CDK
2B53	first chain or A	CDK
2B54	first chain or A	CDK
2B55	first chain or A	CDK
2BHE	first chain or A	CDK
2BHH	first chain or A	CDK
2C5N	first chain or A	CDK
2C5O	first chain or A	CDK
2C5V	first chain or A	CDK
2C5X	first chain or A	CDK
2C5Y	first chain or A	CDK
2CCH	first chain or A	CDK
2CCI	first chain or A	CDK
2CJM	first chain or A	CDK
2DS1	first chain or A	CDK
2DUV	first chain or A	CDK
2EUF	first chain or A	CDK
2EXM	first chain or A	CDK
2F2C	first chain or A	CDK
2FVD	first chain or A	CDK
2G9X	first chain or A	CDK
2IW6	first chain or A	CDK
2IW8	first chain or A	CDK
2IW9	first chain or A	CDK
2R3F	first chain or A	CDK
2R3G	first chain or A	CDK
2R3H	first chain or A	CDK
2R3I	first chain or A	CDK
2R3J	first chain or A	CDK
2R3K	first chain or A	CDK
2R3L	first chain or A	CDK
2R3M	first chain or A	CDK
2R3N	first chain or A	CDK
2R3O	first chain or A	CDK
2R3P	first chain or A	CDK
2R3Q	first chain or A	CDK
2R3R	first chain or A	CDK
2R64	first chain or A	CDK
2UUE	first chain or A	CDK
2UZB	first chain or A	CDK
2UZD	first chain or A	CDK
2UZE	first chain or A	CDK
2UZL	first chain or A	CDK
2UZN	first chain or A	CDK
2UZO	first chain or A	CDK
2V0D	first chain or A	CDK
2V22	first chain or A	CDK
2VTA	first chain or A	CDK
2VTH	first chain or A	CDK
2VTI	first chain or A	CDK
2VTJ	first chain or A	CDK
2VTL	first chain or A	CDK
2VTM	first chain or A	CDK
2VTN	first chain or A	CDK
2VTO	first chain or A	CDK
2VTP	first chain or A	CDK
2VTQ	first chain or A	CDK
2VTR	first chain or A	CDK
2VTS	first chain or A	CDK
2VTT	first chain or A	CDK
2VU3	first chain or A	CDK
2VV9	first chain or A	CDK
2W05	first chain or A	CDK
2W06	first chain or A	CDK
2W17	first chain or A	CDK
2WEV	first chain or A	CDK
2WFY	first chain or A	CDK
2WHB	first chain or A	CDK
2WIH	first chain or A	CDK
2WIP	first chain or A	CDK
2WXV	first chain or A	CDK
2X1N	first chain or A	CDK
3BHT	first chain or A	CDK
3BHU	first chain or A	CDK
3BHV	first chain or A	CDK
3DDP	first chain or A	CDK
3DDQ	first chain or A	CDK
3EID	first chain or A	CDK
3EJ1	first chain or A	CDK
3FZ1	first chain or A	CDK
3IG7	first chain or A	CDK
3IGG	first chain or A	CDK
3LE6	first chain or A	CDK
3MI9	first chain or A	CDK
3MIA	first chain or A	CDK
3NS9	first chain or A	CDK
3NUP	first chain or A	CDK
3NUX	first chain or A	CDK
3PJ8	first chain or A	CDK
3QL8	first chain or A	CDK
3QQF	first chain or A	CDK
3QQG	first chain or A	CDK
3QQH	first chain or A	CDK
3QQJ	first chain or A	CDK
3QQK	first chain or A	CDK
3QQL	first chain or A	CDK
3QRT	first chain or A	CDK
3QRU	first chain or A	CDK
3QTQ	first chain or A	CDK
3QTR	first chain or A	CDK
3QTS	first chain or A	CDK
3QTU	first chain or A	CDK
3QTW	first chain or A	CDK
3QTX	first chain or A	CDK
3QTZ	first chain or A	CDK
3QU0	first chain or A	CDK
3QWJ	first chain or A	CDK
3QWK	first chain or A	CDK
3QX2	first chain or A	CDK
3QX4	first chain or A	CDK
3QXO	first chain or A	CDK
3QXP	first chain or A	CDK
3QZF	first chain or A	CDK
3QZG	first chain or A	CDK
3QZH	first chain or A	CDK
3QZI	first chain or A	CDK
3R1Q	first chain or A	CDK
3R1S	first chain or A	CDK
3R1Y	first chain or A	CDK
3R28	first chain or A	CDK
3R6X	first chain or A	CDK
3R71	first chain or A	CDK
3R73	first chain or A	CDK
3R7E	first chain or A	CDK
3R7I	first chain or A	CDK
3R7U	first chain or A	CDK
3R7V	first chain or A	CDK
3R7Y	first chain or A	CDK
3R83	first chain or A	CDK
3R8L	first chain or A	CDK
3R8M	first chain or A	CDK
3R8P	first chain or A	CDK
3R8U	first chain or A	CDK
3R8V	first chain or A	CDK
3R8Z	first chain or A	CDK
3R9D	first chain or A	CDK
3R9H	first chain or A	CDK
3R9N	first chain or A	CDK
3R9O	first chain or A	CDK
3RAH	first chain or A	CDK
3RAI	first chain or A	CDK
3RAK	first chain or A	CDK
3RAL	first chain or A	CDK
3RJC	first chain or A	CDK
3RK5	first chain or A	CDK
3RK7	first chain or A	CDK
3RK9	first chain or A	CDK
3RKB	first chain or A	CDK
3RM6	first chain or A	CDK
3RM7	first chain or A	CDK
3RMF	first chain or A	CDK
3RNI	first chain or A	CDK
3ROY	first chain or A	CDK
3RPO	first chain or A	CDK
3RPR	first chain or A	CDK
3RPV	first chain or A	CDK
3RPY	first chain or A	CDK
3RZB	first chain or A	CDK
3S00	first chain or A	CDK
3S0O	first chain or A	CDK
3S1H	first chain or A	CDK
3S2P	first chain or A	CDK
3SQQ	first chain or A	CDK
3SW4	first chain or A	CDK
3SW7	first chain or A	CDK
3TI1	first chain or A	CDK
3TIY	first chain or A	CDK
3TIZ	first chain or A	CDK
3TNW	first chain or A	CDK
3ULI	first chain or A	CDK
3UNJ	first chain or A	CDK
3UNK	first chain or A	CDK
3WBL	first chain or A	CDK
4ACM	first chain or A	CDK
4BCK	first chain or A	CDK
4BCM	first chain or A	CDK
4BCN	first chain or A	CDK
4BCO	first chain or A	CDK
4BCP	first chain or A	CDK
4BCQ	first chain or A	CDK
4BGH	first chain or A	CDK
4BZD	first chain or A	CDK
4CFM	first chain or A	CDK
4CFN	first chain or A	CDK
4CFU	first chain or A	CDK
4CFV	first chain or A	CDK
4CFW	first chain or A	CDK
4CFX	first chain or A	CDK
4D1X	first chain or A	CDK
4D1Z	first chain or A	CDK
4EC8	first chain or A	CDK
4EC9	first chain or A	CDK
4EK3	first chain or A	CDK
4EK4	first chain or A	CDK
4EK5	first chain or A	CDK
4EK6	first chain or A	CDK
4EK8	first chain or A	CDK
4EOI	first chain or A	CDK
4EOJ	first chain or A	CDK
4EOK	first chain or A	CDK
4EOL	first chain or A	CDK
4EOM	first chain or A	CDK
4EON	first chain or A	CDK
4EOO	first chain or A	CDK
4EOP	first chain or A	CDK
4EOQ	first chain or A	CDK
4EOR	first chain or A	CDK
4EOS	first chain or A	CDK
4ERW	first chain or A	CDK
4EZ3	first chain or A	CDK
4EZ7	first chain or A	CDK
4FKG	first chain or A	CDK
4FKI	first chain or A	CDK
4FKJ	first chain or A	CDK
4FKL	first chain or A	CDK
4FKO	first chain or A	CDK
4FKP	first chain or A	CDK
4FKQ	first chain or A	CDK
4FKR	first chain or A	CDK
4FKS	first chain or A	CDK
4FKT	first chain or A	CDK
4FKU	first chain or A	CDK
4FKV	first chain or A	CDK
4FKW	first chain or A	CDK
4FX3	first chain or A	CDK
4GCJ	first chain or A	CDK
4I3Z	first chain or A	CDK
4II5	first chain or A	CDK
4IMY	first chain or A	CDK
4KD1	first chain or A	CDK
4LYN	first chain or A	CDK
4NJ3	first chain or A	CDK
4OGR	first chain or A	CDK
4OR5	first chain or A	CDK
4RJ3	first chain or A	CDK
4TTH	first chain or A	CDK
5A14	first chain or A	CDK
5AND	first chain or A	CDK
5ANE	first chain or A	CDK
5ANG	first chain or A	CDK
5ANI	first chain or A	CDK
5ANJ	first chain or A	CDK
5ANK	first chain or A	CDK
5ANO	first chain or A	CDK
5CYI	first chain or A	CDK
5D1J	first chain or A	CDK
5FP5	first chain or A	CDK
5FP6	first chain or A	CDK
5IEV	first chain or A	CDK
5IEX	first chain or A	CDK
5IEY	first chain or A	CDK
5IF1	first chain or A	CDK
5JQ5	first chain or A	CDK
5JQ8	first chain or A	CDK
5K4J	first chain or A	CDK
5L1Z	first chain or A	CDK
5L2W	first chain or A	CDK
5LMK	first chain or A	CDK
5MHQ	first chain or A	CDK
5NEV	first chain or A	CDK
5OO0	first chain or A	CDK
5OO1	first chain or A	CDK
5OO3	first chain or A	CDK
5OSJ	first chain or A	CDK
5OSM	first chain or A	CDK
5UQ1	first chain or A	CDK
5UQ2	first chain or A	CDK
5UQ3	first chain or A	CDK
6ATH	first chain or A	CDK
6GZH	first chain or A	CDK
1BI7	first chain or A	CDK
1BI8	first chain or A	CDK
1G3N	first chain or A	CDK
4AUA	first chain or A	CDK
4EZ5	first chain or A	CDK
5L2I	first chain or A	CDK
5L2S	first chain or A	CDK
5L2T	first chain or A	CDK
1UA2	first chain or A	CDK
3RGF	first chain or A	CDK
4CRL	first chain or A	CDK
4F6S	first chain or A	CDK
4F6U	first chain or A	CDK
4F6W	first chain or A	CDK
4F70	first chain or A	CDK
4F7J	first chain or A	CDK
4F7L	first chain or A	CDK
4F7N	first chain or A	CDK
4F7S	first chain or A	CDK
4G6L	first chain or A	CDK
5BNJ	first chain or A	CDK
5CEI	first chain or A	CDK
5FGK	first chain or A	CDK
5HBE	first chain or A	CDK
5HBH	first chain or A	CDK
5HBJ	first chain or A	CDK
5HNB	first chain or A	CDK
5HVY	first chain or A	CDK
5I5Z	first chain or A	CDK
5ICP	first chain or A	CDK
5IDN	first chain or A	CDK
5IDP	first chain or A	CDK
5XQX	first chain or A	CDK
5XS2	first chain or A	CDK
3BLH	first chain or A	CDK
3BLQ	first chain or A	CDK
3BLR	first chain or A	CDK
3LQ5	first chain or A	CDK
3MY1	first chain or A	CDK
3TN8	first chain or A	CDK
3TNH	first chain or A	CDK
3TNI	first chain or A	CDK
4BCF	first chain or A	CDK
4BCG	first chain or A	CDK
4BCH	first chain or A	CDK
4BCI	first chain or A	CDK
4BCJ	first chain or A	CDK
1A5Y	first chain or A	tyr_phosphatase
1AAX	first chain or A	tyr_phosphatase
1BZC	first chain or A	tyr_phosphatase
1BZH	first chain or A	tyr_phosphatase
1BZJ	first chain or A	tyr_phosphatase
1C83	first chain or A	tyr_phosphatase
1C84	first chain or A	tyr_phosphatase
1C85	first chain or A	tyr_phosphatase
1C86	first chain or A	tyr_phosphatase
1C87	first chain or A	tyr_phosphatase
1C88	first chain or A	tyr_phosphatase
1ECV	first chain or A	tyr_phosphatase
1EEN	first chain or A	tyr_phosphatase
1EEO	first chain or A	tyr_phosphatase
1FPR	first chain or A	tyr_phosphatase
1G1F	first chain or A	tyr_phosphatase
1G1G	first chain or A	tyr_phosphatase
1G1H	first chain or A	tyr_phosphatase
1G7F	first chain or A	tyr_phosphatase
1G7G	first chain or A	tyr_phosphatase
1GFY	first chain or A	tyr_phosphatase
1GWZ	first chain or A	tyr_phosphatase
1I57	first chain or A	tyr_phosphatase
1JF7	first chain or A	tyr_phosphatase
1JLN	first chain or A	tyr_phosphatase
1KAK	first chain or A	tyr_phosphatase
1KAV	first chain or A	tyr_phosphatase
1L8G	first chain or A	tyr_phosphatase
1L8K	first chain or A	tyr_phosphatase
1LQF	first chain or A	tyr_phosphatase
1NL9	first chain or A	tyr_phosphatase
1NNY	first chain or A	tyr_phosphatase
1NO6	first chain or A	tyr_phosphatase
1NWE	first chain or A	tyr_phosphatase
1NWL	first chain or A	tyr_phosphatase
1NZ7	first chain or A	tyr_phosphatase
1OEM	first chain or A	tyr_phosphatase
1OEO	first chain or A	tyr_phosphatase
1OES	first chain or A	tyr_phosphatase
1OET	first chain or A	tyr_phosphatase
1OEU	first chain or A	tyr_phosphatase
1OEV	first chain or A	tyr_phosphatase
1ONY	first chain or A	tyr_phosphatase
1ONZ	first chain or A	tyr_phosphatase
1P15	first chain or A	tyr_phosphatase
1PA1	first chain or A	tyr_phosphatase
1PH0	first chain or A	tyr_phosphatase
1PTT	first chain or A	tyr_phosphatase
1PTU	first chain or A	tyr_phosphatase
1PTV	first chain or A	tyr_phosphatase
1PTY	first chain or A	tyr_phosphatase
1PXH	first chain or A	tyr_phosphatase
1PYN	first chain or A	tyr_phosphatase
1Q1M	first chain or A	tyr_phosphatase
1Q6J	first chain or A	tyr_phosphatase
1Q6M	first chain or A	tyr_phosphatase
1Q6N	first chain or A	tyr_phosphatase
1Q6P	first chain or A	tyr_phosphatase
1Q6S	first chain or A	tyr_phosphatase
1Q6T	first chain or A	tyr_phosphatase
1QXK	first chain or A	tyr_phosphatase
1RPM	first chain or A	tyr_phosphatase
1SUG	first chain or A	tyr_phosphatase
1T48	first chain or A	tyr_phosphatase
1T49	first chain or A	tyr_phosphatase
1T4J	first chain or A	tyr_phosphatase
1WAX	first chain or A	tyr_phosphatase
1WCH	first chain or A	tyr_phosphatase
1XBO	first chain or A	tyr_phosphatase
1YFO	first chain or A	tyr_phosphatase
1ZC0	first chain or A	tyr_phosphatase
2A3K	first chain or A	tyr_phosphatase
2A8B	first chain or A	tyr_phosphatase
2AHS	first chain or A	tyr_phosphatase
2AZR	first chain or A	tyr_phosphatase
2B07	first chain or A	tyr_phosphatase
2B49	first chain or A	tyr_phosphatase
2B4S	first chain or A	tyr_phosphatase
2BGD	first chain or A	tyr_phosphatase
2BGE	first chain or A	tyr_phosphatase
2BIJ	first chain or A	tyr_phosphatase
2BV5	first chain or A	tyr_phosphatase
2BZL	first chain or A	tyr_phosphatase
2C7S	first chain or A	tyr_phosphatase
2CFV	first chain or A	tyr_phosphatase
2CJZ	first chain or A	tyr_phosphatase
2CM2	first chain or A	tyr_phosphatase
2CM3	first chain or A	tyr_phosphatase
2CM7	first chain or A	tyr_phosphatase
2CM8	first chain or A	tyr_phosphatase
2CMA	first chain or A	tyr_phosphatase
2CMB	first chain or A	tyr_phosphatase
2CMC	first chain or A	tyr_phosphatase
2CNE	first chain or A	tyr_phosphatase
2CNF	first chain or A	tyr_phosphatase
2CNG	first chain or A	tyr_phosphatase
2CNH	first chain or A	tyr_phosphatase
2CNI	first chain or A	tyr_phosphatase
2F6F	first chain or A	tyr_phosphatase
2F6T	first chain or A	tyr_phosphatase
2F6V	first chain or A	tyr_phosphatase
2F6W	first chain or A	tyr_phosphatase
2F6Y	first chain or A	tyr_phosphatase
2F6Z	first chain or A	tyr_phosphatase
2F70	first chain or A	tyr_phosphatase
2F71	first chain or A	tyr_phosphatase
2FJM	first chain or A	tyr_phosphatase
2FJN	first chain or A	tyr_phosphatase
2G59	first chain or A	tyr_phosphatase
2GJT	first chain or A	tyr_phosphatase
2GP0	first chain or A	tyr_phosphatase
2H02	first chain or A	tyr_phosphatase
2H03	first chain or A	tyr_phosphatase
2H04	first chain or A	tyr_phosphatase
2H4G	first chain or A	tyr_phosphatase
2H4K	first chain or A	tyr_phosphatase
2H4V	first chain or A	tyr_phosphatase
2HB1	first chain or A	tyr_phosphatase
2HC1	first chain or A	tyr_phosphatase
2HC2	first chain or A	tyr_phosphatase
2HNP	first chain or A	tyr_phosphatase
2HNQ	first chain or A	tyr_phosphatase
2HVL	first chain or A	tyr_phosphatase
2HY3	first chain or A	tyr_phosphatase
2I1Y	first chain or A	tyr_phosphatase
2I3R	first chain or A	tyr_phosphatase
2I3U	first chain or A	tyr_phosphatase
2I42	first chain or A	tyr_phosphatase
2I4E	first chain or A	tyr_phosphatase
2I4G	first chain or A	tyr_phosphatase
2I4H	first chain or A	tyr_phosphatase
2I5X	first chain or A	tyr_phosphatase
2I75	first chain or A	tyr_phosphatase
2NT7	first chain or A	tyr_phosphatase
2NTA	first chain or A	tyr_phosphatase
2NV5	first chain or A	tyr_phosphatase
2NZ6	first chain or A	tyr_phosphatase
2OC3	first chain or A	tyr_phosphatase
2OOQ	first chain or A	tyr_phosphatase
2P6X	first chain or A	tyr_phosphatase
2PA5	first chain or A	tyr_phosphatase
2PBN	first chain or A	tyr_phosphatase
2PI7	first chain or A	tyr_phosphatase
2QBP	first chain or A	tyr_phosphatase
2QBQ	first chain or A	tyr_phosphatase
2QBR	first chain or A	tyr_phosphatase
2QBS	first chain or A	tyr_phosphatase
2QCJ	first chain or A	tyr_phosphatase
2QCT	first chain or A	tyr_phosphatase
2QDC	first chain or A	tyr_phosphatase
2QDM	first chain or A	tyr_phosphatase
2QDP	first chain or A	tyr_phosphatase
2QEP	first chain or A	tyr_phosphatase
2VEU	first chain or A	tyr_phosphatase
2VEV	first chain or A	tyr_phosphatase
2VEW	first chain or A	tyr_phosphatase
2VEX	first chain or A	tyr_phosphatase
2VEY	first chain or A	tyr_phosphatase
2Y2F	first chain or A	tyr_phosphatase
2YDU	first chain or A	tyr_phosphatase
2ZMM	first chain or A	tyr_phosphatase
2ZN7	first chain or A	tyr_phosphatase
3A5J	first chain or A	tyr_phosphatase
3A5K	first chain or A	tyr_phosphatase
3B7O	first chain or A	tyr_phosphatase
3BLT	first chain or A	tyr_phosphatase
3BLU	first chain or A	tyr_phosphatase
3BM8	first chain or A	tyr_phosphatase
3BRH	first chain or A	tyr_phosphatase
3CWE	first chain or A	tyr_phosphatase
3D42	first chain or A	tyr_phosphatase
3D44	first chain or A	tyr_phosphatase
3D9C	first chain or A	tyr_phosphatase
3EAX	first chain or A	tyr_phosphatase
3EB1	first chain or A	tyr_phosphatase
3EU0	first chain or A	tyr_phosphatase
3F99	first chain or A	tyr_phosphatase
3F9A	first chain or A	tyr_phosphatase
3F9B	first chain or A	tyr_phosphatase
3H2X	first chain or A	tyr_phosphatase
3I36	first chain or A	tyr_phosphatase
3I7Z	first chain or A	tyr_phosphatase
3I80	first chain or A	tyr_phosphatase
3M4U	first chain or A	tyr_phosphatase
3MOW	first chain or A	tyr_phosphatase
3O4S	first chain or A	tyr_phosphatase
3O4T	first chain or A	tyr_phosphatase
3O4U	first chain or A	tyr_phosphatase
3O5X	first chain or A	tyr_phosphatase
3OLR	first chain or A	tyr_phosphatase
3OMH	first chain or A	tyr_phosphatase
3QCB	first chain or A	tyr_phosphatase
3QCC	first chain or A	tyr_phosphatase
3QCD	first chain or A	tyr_phosphatase
3QCE	first chain or A	tyr_phosphatase
3QCF	first chain or A	tyr_phosphatase
3QCG	first chain or A	tyr_phosphatase
3QCH	first chain or A	tyr_phosphatase
3QCI	first chain or A	tyr_phosphatase
3QCJ	first chain or A	tyr_phosphatase
3QCK	first chain or A	tyr_phosphatase
3QCL	first chain or A	tyr_phosphatase
3QCM	first chain or A	tyr_phosphatase
3QCN	first chain or A	tyr_phosphatase
3QKP	first chain or A	tyr_phosphatase
3QKQ	first chain or A	tyr_phosphatase
3S3E	first chain or A	tyr_phosphatase
3S3F	first chain or A	tyr_phosphatase
3S3H	first chain or A	tyr_phosphatase
3S3K	first chain or A	tyr_phosphatase
3SME	first chain or A	tyr_phosphatase
3U96	first chain or A	tyr_phosphatase
3ZM0	first chain or A	tyr_phosphatase
3ZM1	first chain or A	tyr_phosphatase
3ZM2	first chain or A	tyr_phosphatase
3ZM3	first chain or A	tyr_phosphatase
3ZMP	first chain or A	tyr_phosphatase
3ZMQ	first chain or A	tyr_phosphatase
3ZV2	first chain or A	tyr_phosphatase
4AZ1	first chain or A	tyr_phosphatase
4BJO	first chain or A	tyr_phosphatase
4GE2	first chain or A	tyr_phosphatase
4GE5	first chain or A	tyr_phosphatase
4GE6	first chain or A	tyr_phosphatase
4GFU	first chain or A	tyr_phosphatase
4GFV	first chain or A	tyr_phosphatase
4GRY	first chain or A	tyr_phosphatase
4GRZ	first chain or A	tyr_phosphatase
4GS0	first chain or A	tyr_phosphatase
4HJP	first chain or A	tyr_phosphatase
4HJQ	first chain or A	tyr_phosphatase
4I8N	first chain or A	tyr_phosphatase
4ICZ	first chain or A	tyr_phosphatase
4IKC	first chain or A	tyr_phosphatase
4J51	first chain or A	tyr_phosphatase
4NND	first chain or A	tyr_phosphatase
4PVG	first chain or A	tyr_phosphatase
4QAH	first chain or A	tyr_phosphatase
4QAP	first chain or A	tyr_phosphatase
4QBE	first chain or A	tyr_phosphatase
4QBW	first chain or A	tyr_phosphatase
4QUM	first chain or A	tyr_phosphatase
4QUN	first chain or A	tyr_phosphatase
4RDD	first chain or A	tyr_phosphatase
4RH5	first chain or A	tyr_phosphatase
4RH9	first chain or A	tyr_phosphatase
4RHG	first chain or A	tyr_phosphatase
4RI4	first chain or A	tyr_phosphatase
4RI5	first chain or A	tyr_phosphatase
4S0G	first chain or A	tyr_phosphatase
4Y14	first chain or A	tyr_phosphatase
4YAA	first chain or A	tyr_phosphatase
4Z6B	first chain or A	tyr_phosphatase
4ZI4	first chain or A	tyr_phosphatase
4ZN5	first chain or A	tyr_phosphatase
4ZRT	first chain or A	tyr_phosphatase
5AWX	first chain or A	tyr_phosphatase
5H08	first chain or A	tyr_phosphatase
5HDE	first chain or A	tyr_phosphatase
5J8R	first chain or A	tyr_phosphatase
5K9V	first chain or A	tyr_phosphatase
5K9W	first chain or A	tyr_phosphatase
5KA0	first chain or A	tyr_phosphatase
5KA1	first chain or A	tyr_phosphatase
5KA2	first chain or A	tyr_phosphatase
5KA3	first chain or A	tyr_phosphatase
5KA4	first chain or A	tyr_phosphatase
5KA7	first chain or A	tyr_phosphatase
5KA8	first chain or A	tyr_phosphatase
5KA9	first chain or A	tyr_phosphatase
5KAA	first chain or A	tyr_phosphatase
5KAB	first chain or A	tyr_phosphatase
5KAC	first chain or A	tyr_phosphatase
5KAD	first chain or A	tyr_phosphatase
5OVR	first chain or A	tyr_phosphatase
5OVX	first chain or A	tyr_phosphatase
5OW1	first chain or A	tyr_phosphatase
5QDE	first chain or A	tyr_phosphatase
5QDF	first chain or A	tyr_phosphatase
5QDG	first chain or A	tyr_phosphatase
5QDH	first chain or A	tyr_phosphatase
5QDI	first chain or A	tyr_phosphatase
5QDJ	first chain or A	tyr_phosphatase
5QDK	first chain or A	tyr_phosphatase
5QDL	first chain or A	tyr_phosphatase
5QDM	first chain or A	tyr_phosphatase
5QDN	first chain or A	tyr_phosphatase
5QDO	first chain or A	tyr_phosphatase
5QDP	first chain or A	tyr_phosphatase
5QDQ	first chain or A	tyr_phosphatase
5QDR	first chain or A	tyr_phosphatase
5QDS	first chain or A	tyr_phosphatase
5QDT	first chain or A	tyr_phosphatase
5QDU	first chain or A	tyr_phosphatase
5QDV	first chain or A	tyr_phosphatase
5QDW	first chain or A	tyr_phosphatase
5QDX	first chain or A	tyr_phosphatase
5QDY	first chain or A	tyr_phosphatase
5QDZ	first chain or A	tyr_phosphatase
5QE0	first chain or A	tyr_phosphatase
5QE1	first chain or A	tyr_phosphatase
5QE2	first chain or A	tyr_phosphatase
5QE3	first chain or A	tyr_phosphatase
5QE4	first chain or A	tyr_phosphatase
5QE5	first chain or A	tyr_phosphatase
5QE6	first chain or A	tyr_phosphatase
5QE7	first chain or A	tyr_phosphatase
5QE8	first chain or A	tyr_phosphatase
5QE9	first chain or A	tyr_phosphatase
5QEA	first chain or A	tyr_phosphatase
5QEB	first chain or A	tyr_phosphatase
5QEC	first chain or A	tyr_phosphatase
5QED	first chain or A	tyr_phosphatase
5QEE	first chain or A	tyr_phosphatase
5QEF	first chain or A	tyr_phosphatase
5QEG	first chain or A	tyr_phosphatase
5QEH	first chain or A	tyr_phosphatase
5QEI	first chain or A	tyr_phosphatase
5QEJ	first chain or A	tyr_phosphatase
5QEK	first chain or A	tyr_phosphatase
5QEL	first chain or A	tyr_phosphatase
5QEM	first chain or A	tyr_phosphatase
5QEN	first chain or A	tyr_phosphatase
5QEO	first chain or A	tyr_phosphatase
5QEP	first chain or A	tyr_phosphatase
5QEQ	first chain or A	tyr_phosphatase
5QER	first chain or A	tyr_phosphatase
5QES	first chain or A	tyr_phosphatase
5QET	first chain or A	tyr_phosphatase
5QEU	first chain or A	tyr_phosphatase
5QEV	first chain or A	tyr_phosphatase
5QEW	first chain or A	tyr_phosphatase
5QEX	first chain or A	tyr_phosphatase
5QEY	first chain or A	tyr_phosphatase
5QEZ	first chain or A	tyr_phosphatase
5QF0	first chain or A	tyr_phosphatase
5QF1	first chain or A	tyr_phosphatase
5QF2	first chain or A	tyr_phosphatase
5QF3	first chain or A	tyr_phosphatase
5QF4	first chain or A	tyr_phosphatase
5QF5	first chain or A	tyr_phosphatase
5QF6	first chain or A	tyr_phosphatase
5QF7	first chain or A	tyr_phosphatase
5QF8	first chain or A	tyr_phosphatase
5QF9	first chain or A	tyr_phosphatase
5QFA	first chain or A	tyr_phosphatase
5QFB	first chain or A	tyr_phosphatase
5QFC	first chain or A	tyr_phosphatase
5QFD	first chain or A	tyr_phosphatase
5QFE	first chain or A	tyr_phosphatase
5QFF	first chain or A	tyr_phosphatase
5QFG	first chain or A	tyr_phosphatase
5QFH	first chain or A	tyr_phosphatase
5QFI	first chain or A	tyr_phosphatase
5QFJ	first chain or A	tyr_phosphatase
5QFK	first chain or A	tyr_phosphatase
5QFL	first chain or A	tyr_phosphatase
5QFM	first chain or A	tyr_phosphatase
5QFN	first chain or A	tyr_phosphatase
5QFO	first chain or A	tyr_phosphatase
5QFP	first chain or A	tyr_phosphatase
5QFQ	first chain or A	tyr_phosphatase
5QFR	first chain or A	tyr_phosphatase
5QFS	first chain or A	tyr_phosphatase
5QFT	first chain or A	tyr_phosphatase
5QFU	first chain or A	tyr_phosphatase
5QFV	first chain or A	tyr_phosphatase
5QFW	first chain or A	tyr_phosphatase
5QFX	first chain or A	tyr_phosphatase
5QFY	first chain or A	tyr_phosphatase
5QFZ	first chain or A	tyr_phosphatase
5QG0	first chain or A	tyr_phosphatase
5QG1	first chain or A	tyr_phosphatase
5QG2	first chain or A	tyr_phosphatase
5QG3	first chain or A	tyr_phosphatase
5QG4	first chain or A	tyr_phosphatase
5QG5	first chain or A	tyr_phosphatase
5QG6	first chain or A	tyr_phosphatase
5QG7	first chain or A	tyr_phosphatase
5QG8	first chain or A	tyr_phosphatase
5QG9	first chain or A	tyr_phosphatase
5QGA	first chain or A	tyr_phosphatase
5QGB	first chain or A	tyr_phosphatase
5QGC	first chain or A	tyr_phosphatase
5QGD	first chain or A	tyr_phosphatase
5QGE	first chain or A	tyr_phosphatase
5QGF	first chain or A	tyr_phosphatase
5T19	first chain or A	tyr_phosphatase
6B8E	first chain or A	tyr_phosphatase
6B8T	first chain or A	tyr_phosphatase
6B8X	first chain or A	tyr_phosphatase
6B8Z	first chain or A	tyr_phosphatase
6B90	first chain or A	tyr_phosphatase
6B95	first chain or A	tyr_phosphatase
6BAI	first chain or A	tyr_phosphatase
6CWV	first chain or A	tyr_phosphatase
6D3F	first chain or A	tyr_phosphatase
6D4D	first chain or A	tyr_phosphatase
6D4F	first chain or A	tyr_phosphatase
6H8R	first chain or A	tyr_phosphatase
6H8S	first chain or A	tyr_phosphatase
1FJM	first chain or A	ser_thr_phosphatase
1IT6	first chain or A	ser_thr_phosphatase
1JK7	first chain or A	ser_thr_phosphatase
1M63	first chain or A	ser_thr_phosphatase
1MF8	first chain or A	ser_thr_phosphatase
1S70	first chain or A	ser_thr_phosphatase
1S95	first chain or A	ser_thr_phosphatase
1TCO	first chain or A	ser_thr_phosphatase
1U32	first chain or A	ser_thr_phosphatase
1WAO	first chain or A	ser_thr_phosphatase
2BCD	first chain or A	ser_thr_phosphatase
2BDX	first chain or A	ser_thr_phosphatase
2DFJ	first chain or A	ser_thr_phosphatase
2IE3	first chain or A	ser_thr_phosphatase
2IE4	first chain or A	ser_thr_phosphatase
2JOG	first chain or A	ser_thr_phosphatase
2O8A	first chain or A	ser_thr_phosphatase
2O8G	first chain or A	ser_thr_phosphatase
2P6B	first chain or A	ser_thr_phosphatase
3E7A	first chain or A	ser_thr_phosphatase
3E7B	first chain or A	ser_thr_phosphatase
3EGG	first chain or A	ser_thr_phosphatase
3EGG	first chain or A	ser_thr_phosphatase
3EGH	first chain or A	ser_thr_phosphatase
3H60	first chain or A	ser_thr_phosphatase
3H61	first chain or A	ser_thr_phosphatase
3H62	first chain or A	ser_thr_phosphatase
3H63	first chain or A	ser_thr_phosphatase
3H64	first chain or A	ser_thr_phosphatase
3H66	first chain or A	ser_thr_phosphatase
3H67	first chain or A	ser_thr_phosphatase
3H68	first chain or A	ser_thr_phosphatase
3H69	first chain or A	ser_thr_phosphatase
3HVQ	first chain or A	ser_thr_phosphatase
3ICF	first chain or A	ser_thr_phosphatase
3K7V	first chain or A	ser_thr_phosphatase
3K7W	first chain or A	ser_thr_phosphatase
3LL8	first chain or A	ser_thr_phosphatase
3N5U	first chain or A	ser_thr_phosphatase
3P71	first chain or A	ser_thr_phosphatase
3V4Y	first chain or A	ser_thr_phosphatase
4F0Z	first chain or A	ser_thr_phosphatase
4G9J	first chain or A	ser_thr_phosphatase
4JA7	first chain or A	ser_thr_phosphatase
4JA9	first chain or A	ser_thr_phosphatase
4MOV	first chain or A	ser_thr_phosphatase
4MOY	first chain or A	ser_thr_phosphatase
4MP0	first chain or A	ser_thr_phosphatase
4UT2	first chain or A	ser_thr_phosphatase
4UT3	first chain or A	ser_thr_phosphatase
4V0V	first chain or A	ser_thr_phosphatase
4V0W	first chain or A	ser_thr_phosphatase
4V0X	first chain or A	ser_thr_phosphatase
4XPN	first chain or A	ser_thr_phosphatase
4ZVZ	first chain or A	ser_thr_phosphatase
4ZX2	first chain or A	ser_thr_phosphatase
4ZX2	first chain or A	ser_thr_phosphatase
5B8I	first chain or A	ser_thr_phosphatase
5C1V	first chain or A	ser_thr_phosphatase
5HPE	first chain or A	ser_thr_phosphatase
5INB	first chain or A	ser_thr_phosphatase
5IOH	first chain or A	ser_thr_phosphatase
5J28	first chain or A	ser_thr_phosphatase
5JJT	first chain or A	ser_thr_phosphatase
5JPE	first chain or A	ser_thr_phosphatase
5JPF	first chain or A	ser_thr_phosphatase
5SVE	first chain or A	ser_thr_phosphatase
5UI1	first chain or A	ser_thr_phosphatase
5WG8	first chain or A	ser_thr_phosphatase
6ALZ	first chain or A	ser_thr_phosphatase
